# Supplementary material for: The effects of soleus fascicle length on muscle fatigability
Source: PeerJ. 2025 Aug 21;13:e19842. doi: 10.7717/peerj.19842 (PMC12375294; doi:10.7717/peerj.19842)
Supplement: Supplemental Information 2 [file peerj-13-19842-s002.xlsx]

## Sheet: Sheet1
Subject No.	Time to Fatigue (s)		MG Length (mm)		SOL Length (mm)		EMG Frequency (Hz)				Normalized RMS EMG (%)
							DF		PF		DF		PF
	DF	PF	DF	PF	DF	PF	Early	Late	Early	Late	Early	Late	Early	Late
YA01	240.718	178.713	32.5	28.4	34.9	31.3	86.9141	92.5781	139.323	134.375	56.9623	41.2296	131.896	108.953
YA02	1020.74	372.744	32.9	24.3	35.3	28.4	128.255	107.812	148.438	128.516	40.6321	41.523	90.0768	122.546
YA03	682.725	414.724	45.3	36.7	46.2	38.7	123.698	116.406	149.414	125	34.4069	68.1718	95.9194	107.596
YA04	552.742	252.746	40.8	30.7	43.5	36.8	110.352	118.75	154.948	116.797	16.4481	20.5689	65.3461	76
YA05	698.687	48.7593	41.3	34.7	40.3	32.6	137.695	127.344	194.01	189.453	34.0766	39.5438	103.289	90.5234
YA06	296.735	256.722	40.7	34.1	42.7	37.7	77.474	96.875	136.393	126.172	35.1894	41.3958	97.7709	77.7961
YA07	464.742	116.731	40.1	32.7	41.4	37.2	101.888	77.3438	150.716	160.938	63.687	85.7743	109.479	102.816
YA08	822.735	106.728	35.9	33.6	34.9	27.4	89.5182	92.9688	133.138	128.125	28.168	25.0308	56.0891	60.8028
YA09	86.7089	76.7094	49	32.9	43.7	38	111.328	114.844	160.156	156.25	79.832	72.1007	91.5982	100.203
YA10	372.755	222.759	43.9	36	43.5	35	110.352	98.8281	132.487	119.141	47.2787	52.9077	105.311	101.056
YA11	122.752	104.752	44.7	30.5	42.1	38.2	110.677	82.0313	167.318	147.266	70.1955	67.7529	130.148	149.074
YA12	504.767	460.767	54.2	41	51.8	42.6	100.586	90.625	153.646	166.016	50.7448	46.9261	121.871	136.155
YA13	166.745	98.7121	47.8	34.4	39.9	35.7	134.115	125.391	167.318	155.859	68.7212	73.1373	103.618	94.6929
YA14	268.751	78.736	54	42.5	46.6	43.7	89.5182	97.6563	131.51	129.297	76.9985	52.5465	163.201	124.808
YA15	440.754	222.758	56.4	45.3	51.4	47.2	87.5651	54.2969	132.812	129.297	51.2314	63.6313	109.465	88.2525
