# Supplementary material for: The effects of soleus fascicle length on muscle fatigability
Source: PeerJ journal article supplement (doi:10.7717/peerj.19842), 2025-08-21
Supplement: SupplementaryUltrasound.pdf [file SupplementaryUltrasound.pdf]

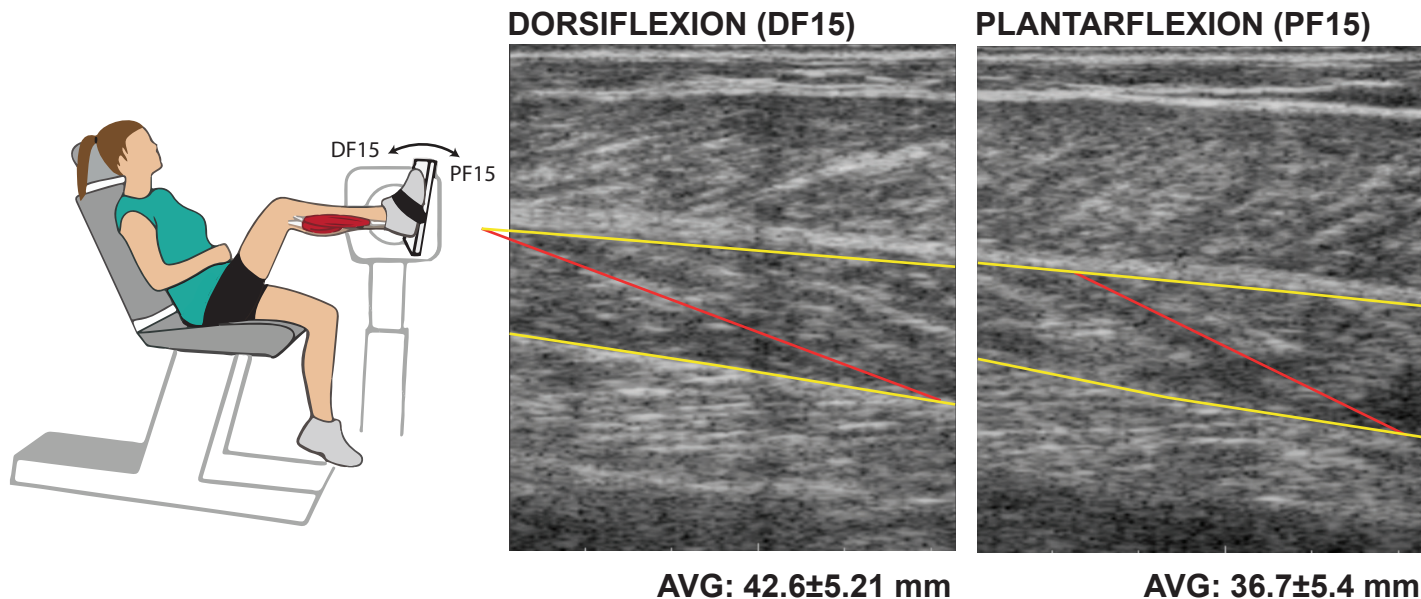

**Supplementary Figure.** Representative B-mode ultrasound images for a single subject showing the soleus fascicle length (with accompanying average values and standard deviations) at both ankle joint angles. Data were captured at rest and analyzed using UltraTrack.
